# Supplementary material for: Antihyperglycemic and antihyperlipidemic activities of protodioscin in a high-fat diet and streptozotocin-induced diabetic rats
Source: Royal Society of Chemistry journal article supplement (doi:10.1039/c6ra18448k), 2016-01-01
Supplement: c6ra18448k1.pdf [file c6ra18448k1.pdf]

**Table 1** Effects of different treatments on food intake, water intake and urine volume in diabetic rats.

|                     | NC    | DC    | MET   | Pdio-10 | Pdio-20 | Pdio-40 |
|---------------------|-------|-------|-------|---------|---------|---------|
| <b>Food intake</b>  | 73.3  | 183.5 | 91.1  | 138.1   | 97.8    | 118.6   |
|                     | 78.9  | 174.3 | 96.4  | 194.5   | 120.5   | 98.2    |
|                     | 67.5  | 188.4 | 125.6 | 173.2   | 125.1   | 103.3   |
|                     | 76.9  | 198.3 | 123.6 | 130.2   | 129.8   | 124.7   |
|                     | 67.7  | 147.8 | 138.1 | 138.8   | 136.3   | 92.6    |
|                     | 76.6  | 180.5 | 134.8 | 130.9   | 121.8   | 115.2   |
|                     | 96.8  | 118.1 | 142.6 | 151.4   | 133.4   | 108.6   |
|                     | 76.2  | 172.9 | 121.8 | 136.9   | 127.7   | 76.6    |
|                     | 56.9  | 174.9 | 118.8 | 161.4   | 125.9   | 103.3   |
|                     | 74.5  | 191.7 | 128.7 | 157.9   | 168.8   | 119.5   |
| <b>Water intake</b> | 90.8  | 572.5 | 273.3 | 264.4   | 214.3   | 255.8   |
|                     | 82.1  | 522.9 | 286.2 | 261.5   | 183.5   | 194.6   |
|                     | 70.2  | 565.2 | 266.8 | 275.3   | 259.6   | 219.9   |
|                     | 90.2  | 594.9 | 271.8 | 291.7   | 190.6   | 174.1   |
|                     | 70.4  | 443.4 | 207.3 | 208.9   | 290.4   | 177.8   |
|                     | 79.7  | 541.5 | 204.4 | 265.4   | 192.7   | 229.6   |
|                     | 90.7  | 459.3 | 227.8 | 199.6   | 294.4   | 225.8   |
|                     | 79.2  | 518.7 | 215.4 | 283.1   | 210.7   | 228.8   |
|                     | 59.5  | 594.7 | 256.4 | 277.7   | 214.2   | 209.9   |
|                     | 77.5  | 691.1 | 285.1 | 218.4   | 189.1   | 179.5   |
| <b>Urine volume</b> | 104.3 | 443.8 | 244.6 | 235.7   | 227.1   | 205.6   |
|                     | 74.3  | 464.2 | 257.5 | 229.8   | 185.9   | 154.8   |
|                     | 63.4  | 436.5 | 238.1 | 226.6   | 191.2   | 232.9   |
|                     | 102.4 | 456.2 | 243.1 | 204.3   | 195.4   | 171.9   |
|                     | 63.6  | 414.9 | 178.6 | 190.2   | 199.1   | 261.7   |
|                     | 91.9  | 412.8 | 176.2 | 236.7   | 200.9   | 195.4   |
|                     | 101.9 | 430.6 | 179.1 | 175.9   | 197.1   | 165.7   |
|                     | 75.4  | 575.3 | 186.7 | 234.4   | 199.1   | 182     |
|                     | 91.7  | 576.1 | 227.7 | 213.7   | 181.2   | 185.5   |
|                     | 69.7  | 464.4 | 256.4 | 189.7   | 248.1   | 180.4   |

**Table 2** Effects of different treatments on blood glucose, insulin and HOMA value in diabetic rats.

|                                                    | <b>NC</b> | <b>DC</b> | <b>MET</b> | <b>Pdio-10</b> | <b>Pdio-20</b> | <b>Pdio-40</b> |
|----------------------------------------------------|-----------|-----------|------------|----------------|----------------|----------------|
| blood glucose<br><br><b>before<br/>treatment</b>   | 4.1       | 30.5      | 20.9       | 27.9           | 20.3           | 22.4           |
|                                                    | 6.2       | 22.1      | 20.5       | 29.5           | 22.2           | 28.1           |
|                                                    | 5.4       | 29.5      | 31.3       | 27.6           | 22.4           | 23.8           |
|                                                    | 4.3       | 23.2      | 22.9       | 31.2           | 25.9           | 25.3           |
|                                                    | 4.1       | 22.4      | 30.3       | 22.7           | 29.9           | 24.9           |
|                                                    | 5.2       | 22.6      | 31.4       | 23.8           | 27.1           | 23.9           |
|                                                    | 5.4       | 31.4      | 21.7       | 21.7           | 29.9           | 23.1           |
|                                                    | 5.3       | 27.8      | 21.9       | 23.1           | 29.5           | 26.7           |
|                                                    | 5.7       | 32.3      | 31.2       | 25.1           | 21.1           | 22.9           |
|                                                    | 6.3       | 21.8      | 20.4       | 21.3           | 24.4           | 30.1           |
| blood glucose<br><br><b>4 weeks<br/>treatment</b>  | 7.5       | 25.6      | 23.1       | 22.2           | 25.1           | 23.8           |
|                                                    | 8.6       | 30.8      | 16.1       | 22.9           | 25.3           | 11.9           |
|                                                    | 5.7       | 31.2      | 16.8       | 15.1           | 23.1           | 16.8           |
|                                                    | 6.3       | 30.1      | 21.2       | 23.3           | 18.9           | 21.8           |
|                                                    | 9.1       | 29.8      | 17.4       | 20.5           | 18.1           | 15.7           |
|                                                    | 5.2       | 27.6      | 21.0       | 23.2           | 13.2           | 18.4           |
|                                                    | 5.1       | 29.2      | 23.6       | 29.3           | 13.1           | 14.5           |
|                                                    | 5.3       | 28.1      | 16.7       | 21.1           | 24.3           | 22.1           |
|                                                    | 5.7       | 22.3      | 22.8       | 16.4           | 22.7           | 22.4           |
|                                                    | 6.2       | 31.4      | 27.7       | 16.5           | 17.7           | 16.2           |
| blood glucose<br><br><b>8 weeks<br/>treatment</b>  | 5.9       | 32.4      | 16.7       | 22.9           | 20.2           | 20.2           |
|                                                    | 6.7       | 27.6      | 19.6       | 27.3           | 14.4           | 16.2           |
|                                                    | 6.1       | 24.4      | 15.7       | 17             | 22.6           | 19.2           |
|                                                    | 7.1       | 27.5      | 16.3       | 20.1           | 16.5           | 13.7           |
|                                                    | 6.6       | 32.6      | 26.7       | 20.9           | 16.6           | 15.3           |
|                                                    | 6.7       | 31.8      | 14.1       | 15.8           | 15.3           | 10.1           |
|                                                    | 5.5       | 21.9      | 21.6       | 10.4           | 15.6           | 26.8           |
|                                                    | 6.3       | 26.9      | 10.8       | 20.9           | 21.4           | 15.2           |
|                                                    | 6.7       | 32.7      | 14.3       | 23.2           | 21.7           | 17.4           |
|                                                    | 6.7       | 27.6      | 22.3       | 16.2           | 12.4           | 16.2           |
| blood glucose<br><br><b>12 weeks<br/>treatment</b> | 8.7       | 22.1      | 18.0       | 23.9           | 12.2           | 20.3           |
|                                                    | 7.9       | 24.7      | 11.1       | 23.3           | 12.7           | 18.8           |
|                                                    | 6.8       | 25.2      | 17.8       | 19.1           | 14.1           | 17.7           |
|                                                    | 6.8       | 25.5      | 17.8       | 19.1           | 14.4           | 16.9           |
|                                                    | 6.5       | 25.6      | 12.2       | 18.7           | 16.8           | 16.1           |
|                                                    | 6.4       | 26.6      | 19.8       | 16.8           | 17.9           | 15.6           |
|                                                    | 6.3       | 26.9      | 20.2       | 15.7           | 18.3           | 14.4           |
|                                                    | 6.1       | 28.3      | 20.4       | 15.4           | 18.3           | 13.5           |
|                                                    | 5.9       | 29.2      | 22.4       | 13.8           | 19.4           | 10.6           |
|                                                    | 5.6       | 31.4      | 28.6       | 13.2           | 25.4           | 10.5           |
| <b>insurn</b>                                      | 17.6      | 11.7      | 18.2       | 15.7           | 19.9           | 13.7           |

|                       |      |      |      |      |      |      |
|-----------------------|------|------|------|------|------|------|
|                       | 20.4 | 13.1 | 17.7 | 18.6 | 12.2 | 14.8 |
|                       | 20.5 | 14.4 | 16.9 | 18.7 | 12.2 | 15.2 |
|                       | 20.7 | 13.8 | 16.4 | 19.6 | 12.3 | 16.2 |
|                       | 20.9 | 15.9 | 15.4 | 14.2 | 14.3 | 14.9 |
|                       | 21.1 | 15.6 | 15.6 | 14.4 | 15.4 | 11.5 |
|                       | 21.8 | 15.2 | 15.6 | 13.1 | 16.1 | 15.1 |
|                       | 22.5 | 15.1 | 14.1 | 13.2 | 17.4 | 17.8 |
|                       | 22.6 | 13.3 | 14.1 | 13.2 | 18.9 | 13.5 |
|                       | 24.1 | 14.4 | 14.8 | 14.1 | 11.6 | 18.6 |
| <b>HOMA<br/>value</b> | 6.8  | 11.5 | 14.6 | 16.7 | 10.8 | 12.4 |
|                       | 7.2  | 14.4 | 8.7  | 19.3 | 6.9  | 12.4 |
|                       | 6.2  | 16.1 | 13.4 | 15.9 | 7.6  | 12.0 |
|                       | 6.3  | 15.6 | 13.0 | 16.6 | 7.9  | 12.2 |
|                       | 6.0  | 18.1 | 8.4  | 11.8 | 10.7 | 10.7 |
|                       | 6.0  | 18.4 | 13.7 | 10.8 | 12.3 | 8.0  |
|                       | 6.1  | 18.2 | 14.0 | 9.1  | 13.1 | 9.7  |
|                       | 6.1  | 19.0 | 12.8 | 9.0  | 14.2 | 10.7 |
|                       | 5.9  | 17.3 | 14.0 | 8.1  | 16.3 | 6.4  |
| 6.0                   | 20.1 | 18.8 | 8.3  | 13.1 | 8.7  |      |

**Table 3** Effects of different treatments on liver index, liver glycogen and muscle glycogen in diabetic rats.

|                        | NC   | DC   | MET  | Pdio-10 | Pdio-20 | Pdio-40 |
|------------------------|------|------|------|---------|---------|---------|
| <b>Liver index</b>     | 20.2 | 49.4 | 58.1 | 52.5    | 45.6    | 43.7    |
|                        | 23.5 | 38.9 | 42.4 | 37.8    | 30.8    | 29.8    |
|                        | 26.2 | 49.6 | 25.6 | 40.2    | 36.8    | 34.1    |
|                        | 22.9 | 49.2 | 40.4 | 43.3    | 39.0    | 37.0    |
|                        | 22.5 | 46.0 | 31.3 | 46.7    | 36.8    | 28.4    |
|                        | 20.3 | 54.8 | 31.8 | 36.7    | 48.9    | 32.7    |
|                        | 26.5 | 46.0 | 69.5 | 36.0    | 38.2    | 35.3    |
|                        | 21.6 | 42.2 | 45.3 | 55.0    | 30.3    | 39.2    |
|                        | 26.5 | 45.4 | 40.6 | 42.3    | 32.5    | 32.3    |
|                        | 22.1 | 38.1 | 35.1 | 43.0    | 39.3    | 46.3    |
| <b>Liver glycogen</b>  | 13.7 | 8.3  | 10.6 | 9.4     | 10.8    | 12.2    |
|                        | 16.6 | 8.9  | 11   | 14.3    | 13.2    | 16.3    |
|                        | 10.3 | 8.5  | 11   | 9.6     | 10.6    | 11.6    |
|                        | 9.2  | 7.9  | 10.5 | 14.6    | 11.4    | 9.6     |
|                        | 9.4  | 9.1  | 17.2 | 9.9     | 9.9     | 10.7    |
|                        | 12   | 9.4  | 14.1 | 8.9     | 11.4    | 13      |
|                        | 14.6 | 9.2  | 10.6 | 8.9     | 8.7     | 8.6     |
|                        | 14.3 | 8.8  | 9.7  | 10.8    | 12      | 11.8    |
|                        | 16.2 | 10.7 | 14.6 | 11.2    | 12.6    | 12.7    |
|                        | 16.4 | 10.8 | 16.1 | 11.1    | 13.1    | 11.9    |
| <b>Muscle glycogen</b> | 1.91 | 1.28 | 1.33 | 1.61    | 1.62    | 1.9     |
|                        | 2.43 | 1.42 | 1.66 | 2.02    | 1.56    | 1.75    |
|                        | 1.81 | 1.49 | 1.44 | 1.19    | 1.53    | 2.04    |
|                        | 1.55 | 1.16 | 1.58 | 1.53    | 1.41    | 1.38    |
|                        | 1.95 | 1.65 | 1.32 | 1.53    | 1.67    | 2.09    |
|                        | 1.77 | 1.39 | 2.64 | 1.61    | 1.71    | 1.54    |
|                        | 1.81 | 1.14 | 2.24 | 1.29    | 1.42    | 1.81    |
|                        | 1.82 | 1.26 | 1.31 | 2.04    | 1.97    | 1.91    |
|                        | 1.82 | 1.47 | 1.96 | 1.88    | 1.72    | 1.99    |
|                        | 2.34 | 1.48 | 2.11 | 1.91    | 1.84    | 1.83    |

**Table 4** Effects of different treatments on TG, TC, LDL-c, NEFA and HDL-c in diabetic rats.

|  | NC | DC | MET | Pdio-10 | Pdio-20 | Pdio-40 |
|--|----|----|-----|---------|---------|---------|
|--|----|----|-----|---------|---------|---------|

|             |      |      |      |      |      |      |
|-------------|------|------|------|------|------|------|
| <b>TG</b>   | 0.9  | 2.12 | 1.27 | 1.82 | 1.83 | 1.09 |
|             | 0.27 | 2.11 | 1.97 | 0.96 | 1.18 | 0.62 |
|             | 0.88 | 2.29 | 1.59 | 1.96 | 1.78 | 1.57 |
|             | 0.42 | 2.98 | 1.55 | 1.21 | 0.95 | 1.54 |
|             | 0.99 | 1.99 | 1.21 | 1.57 | 1.06 | 1.11 |
|             | 0.93 | 2.42 | 1.06 | 1.52 | 1.42 | 1.02 |
|             | 0.73 | 2.87 | 0.91 | 1.82 | 1.91 | 1.24 |
|             | 0.54 | 2.01 | 1.73 | 1.52 | 1.12 | 1.34 |
|             | 0.48 | 2.61 | 1.55 | 1.11 | 1.45 | 1.54 |
|             | 0.99 | 1.91 | 1.21 | 1.47 | 1.06 | 1.21 |
| <b>TC</b>   | 2.86 | 6.36 | 3.81 | 3.46 | 3.49 | 3.27 |
|             | 3.08 | 5.33 | 5.91 | 2.88 | 3.54 | 1.29 |
|             | 3.22 | 5.17 | 4.77 | 3.08 | 3.34 | 4.71 |
|             | 2.58 | 6.58 | 4.65 | 2.63 | 2.86 | 4.52 |
|             | 2.66 | 5.47 | 3.63 | 4.71 | 3.18 | 3.33 |
|             | 3.12 | 4.26 | 3.58 | 3.46 | 4.66 | 3.06 |
|             | 2.95 | 5.61 | 2.63 | 2.96 | 2.73 | 3.72 |
|             | 2.56 | 5.03 | 5.19 | 4.56 | 3.81 | 4.02 |
|             | 2.32 | 5.83 | 4.65 | 3.29 | 4.35 | 2.62 |
|             | 3.61 | 4.29 | 4.93 | 4.41 | 3.18 | 1.68 |
| <b>HDLC</b> | 1.43 | 0.91 | 0.76 | 1.49 | 1.07 | 1.65 |
|             | 1.59 | 0.81 | 1.18 | 1.58 | 0.71 | 1.56 |
|             | 1.91 | 0.86 | 1.15 | 0.92 | 1.67 | 1.01 |
|             | 1.29 | 1.01 | 0.83 | 1.53 | 1.57 | 1.69 |
|             | 1.01 | 0.91 | 1.23 | 0.94 | 1.64 | 1.87 |
|             | 1.59 | 0.71 | 0.71 | 0.99 | 0.93 | 1.61 |
|             | 1.48 | 0.91 | 1.43 | 1.49 | 1.55 | 1.74 |
|             | 1.12 | 0.84 | 1.04 | 1.07 | 0.76 | 0.98 |
|             | 1.96 | 0.85 | 1.43 | 1.16 | 0.97 | 1.52 |
|             | 2.19 | 0.72 | 0.99 | 0.98 | 1.61 | 1.78 |
| <b>LDLC</b> | 1.41 | 5.12 | 3.04 | 2.06 | 1.96 | 1.86 |
|             | 1.39 | 3.04 | 2.72 | 2.24 | 2.32 | 1.24 |
|             | 1.43 | 4.98 | 2.6  | 2.04 | 3.67 | 2.44 |
|             | 1.29 | 5.04 | 3.32 | 1.76 | 2.12 | 1.96 |
|             | 1.51 | 4.99 | 1.92 | 2.48 | 1.76 | 3.58 |
|             | 1.69 | 2.04 | 2.84 | 1.74 | 1.96 | 1.04 |
|             | 1.48 | 4.56 | 1.82 | 1.96 | 1.96 | 1.96 |
|             | 1.42 | 3.16 | 2.16 | 3.65 | 1.38 | 1.72 |
|             | 1.66 | 3.04 | 1.72 | 2.08 | 1.64 | 0.25 |
|             | 1.25 | 2.02 | 3.16 | 2.12 | 1.92 | 0.88 |
| <b>NEFA</b> | 362  | 404  | 372  | 409  | 364  | 305  |
|             | 296  | 456  | 382  | 396  | 396  | 396  |
|             | 382  | 496  | 392  | 208  | 376  | 358  |

|  |     |     |     |     |     |     |
|--|-----|-----|-----|-----|-----|-----|
|  | 304 | 336 | 306 | 358 | 338 | 372 |
|  | 286 | 498 | 377 | 405 | 359 | 210 |
|  | 318 | 394 | 242 | 294 | 245 | 324 |
|  | 408 | 404 | 384 | 374 | 396 | 304 |
|  | 282 | 412 | 394 | 306 | 406 | 386 |
|  | 280 | 452 | 286 | 385 | 396 | 388 |
|  | 288 | 434 | 449 | 376 | 312 | 229 |

**Fig. 3** Effects of Pdio on body weight in diabetic rats.

|          | NC  | DC  | MET | Pdio-10 | Pdio-20 | Pdio-40 |
|----------|-----|-----|-----|---------|---------|---------|
| <b>0</b> | 202 | 207 | 205 | 216     | 187     | 175     |

|   |     |     |     |     |     |     |
|---|-----|-----|-----|-----|-----|-----|
|   | 210 | 241 | 245 | 245 | 181 | 270 |
|   | 216 | 206 | 208 | 188 | 182 | 245 |
|   | 242 | 252 | 202 | 183 | 206 | 238 |
|   | 263 | 250 | 170 | 250 | 224 | 202 |
|   | 178 | 244 | 180 | 241 | 236 | 180 |
|   | 230 | 201 | 235 | 205 | 241 | 245 |
|   | 218 | 236 | 252 | 187 | 243 | 202 |
|   | 240 | 224 | 212 | 252 | 244 | 212 |
|   | 220 | 163 | 242 | 190 | 250 | 242 |
| 2 | 284 | 310 | 304 | 303 | 310 | 304 |
|   | 250 | 304 | 330 | 304 | 255 | 265 |
|   | 303 | 311 | 306 | 330 | 300 | 286 |
|   | 305 | 255 | 335 | 305 | 304 | 336 |
|   | 310 | 318 | 303 | 304 | 311 | 306 |
|   | 277 | 300 | 287 | 300 | 308 | 303 |
|   | 302 | 251 | 350 | 290 | 347 | 287 |
|   | 301 | 310 | 288 | 301 | 336 | 288 |
|   | 316 | 343 | 304 | 320 | 310 | 304 |
|   | 270 | 352 | 303 | 290 | 251 | 303 |
| 4 | 259 | 405 | 311 | 297 | 360 | 380 |
|   | 266 | 295 | 287 | 297 | 366 | 370 |
|   | 377 | 330 | 335 | 330 | 330 | 340 |
|   | 321 | 338 | 286 | 360 | 285 | 340 |
|   | 328 | 335 | 375 | 340 | 280 | 295 |
|   | 275 | 266 | 370 | 390 | 310 | 303 |
|   | 364 | 320 | 320 | 350 | 422 | 277 |
|   | 308 | 395 | 385 | 360 | 370 | 309 |
|   | 303 | 288 | 277 | 286 | 292 | 349 |
|   | 325 | 370 | 355 | 310 | 289 | 341 |
| 7 | 450 | 300 | 370 | 332 | 305 | 311 |
|   | 419 | 312 | 303 | 306 | 295 | 350 |
|   | 413 | 304 | 340 | 304 | 338 | 335 |
|   | 418 | 325 | 365 | 330 | 335 | 335 |
|   | 355 | 305 | 345 | 290 | 330 | 287 |
|   | 455 | 322 | 329 | 320 | 320 | 286 |
|   | 350 | 340 | 307 | 315 | 381 | 320 |
|   | 390 | 330 | 314 | 340 | 370 | 385 |
|   | 430 | 308 | 309 | 325 | 288 | 277 |
|   | 390 | 310 | 360 | 328 | 266 | 355 |
| 9 | 484 | 347 | 382 | 271 | 350 | 300 |
|   | 510 | 320 | 294 | 297 | 313 | 365 |
|   | 469 | 318 | 286 | 350 | 318 | 312 |
|   | 495 | 320 | 296 | 289 | 319 | 325 |

|    |     |     |     |     |     |     |
|----|-----|-----|-----|-----|-----|-----|
|    | 474 | 301 | 300 | 380 | 355 | 305 |
|    | 482 | 317 | 335 | 390 | 334 | 322 |
|    | 375 | 279 | 305 | 276 | 350 | 371 |
|    | 415 | 288 | 288 | 320 | 299 | 330 |
|    | 470 | 319 | 284 | 286 | 301 | 368 |
|    | 415 | 268 | 320 | 330 | 295 | 310 |
| 11 | 485 | 301 | 315 | 365 | 305 | 332 |
|    | 500 | 330 | 322 | 312 | 345 | 358 |
|    | 442 | 301 | 355 | 353 | 349 | 347 |
|    | 491 | 330 | 345 | 357 | 370 | 330 |
|    | 460 | 316 | 338 | 310 | 303 | 306 |
|    | 495 | 304 | 297 | 330 | 360 | 349 |
|    | 462 | 345 | 380 | 330 | 329 | 328 |
|    | 430 | 360 | 252 | 285 | 314 | 325 |
|    | 478 | 289 | 314 | 338 | 309 | 315 |
|    | 495 | 305 | 320 | 320 | 307 | 304 |
| 13 | 515 | 318 | 341 | 343 | 271 | 350 |
|    | 545 | 312 | 356 | 282 | 381 | 388 |
|    | 462 | 314 | 305 | 372 | 351 | 377 |
|    | 523 | 392 | 374 | 259 | 297 | 355 |
|    | 462 | 283 | 325 | 305 | 289 | 334 |
|    | 512 | 301 | 312 | 306 | 391 | 318 |
|    | 548 | 329 | 399 | 331 | 276 | 295 |
|    | 521 | 315 | 255 | 317 | 320 | 299 |
|    | 456 | 280 | 296 | 301 | 330 | 359 |
|    | 467 | 298 | 417 | 314 | 386 | 371 |
| 15 | 523 | 321 | 375 | 315 | 297 | 384 |
|    | 571 | 323 | 342 | 391 | 297 | 366 |
|    | 475 | 319 | 331 | 304 | 330 | 394 |
|    | 532 | 336 | 385 | 269 | 382 | 385 |
|    | 525 | 338 | 303 | 309 | 379 | 280 |
|    | 473 | 322 | 375 | 315 | 390 | 310 |
|    | 533 | 290 | 343 | 275 | 337 | 422 |
|    | 453 | 300 | 341 | 336 | 360 | 397 |
|    | 553 | 267 | 316 | 287 | 286 | 361 |
|    | 549 | 315 | 323 | 286 | 310 | 369 |
| 17 | 525 | 303 | 340 | 337 | 373 | 348 |
|    | 560 | 317 | 360 | 292 | 376 | 391 |
|    | 480 | 307 | 319 | 346 | 372 | 391 |
|    | 523 | 312 | 395 | 358 | 367 | 388 |
|    | 550 | 303 | 316 | 263 | 331 | 381 |
|    | 480 | 300 | 285 | 312 | 317 | 342 |



|  |     |     |     |     |     |     |
|--|-----|-----|-----|-----|-----|-----|
|  | 540 | 315 | 285 | 310 | 341 | 276 |
|  | 456 | 292 | 348 | 315 | 314 | 376 |
|  | 569 | 286 | 420 | 325 | 312 | 385 |
|  | 579 | 269 | 410 | 320 | 298 | 386 |

**Fig. 4** Effects of Pdio on OGTT in diabetic rats.

|    | NC  | DC   | MET  | Pdio-10 | Pdio-20 | Pdio-40 |
|----|-----|------|------|---------|---------|---------|
| 0h | 7.2 | 21.4 | 20.8 | 18.5    | 8.5     | 20.0    |
|    | 5.2 | 16.7 | 11.9 | 16.4    | 16.9    | 13.2    |
|    | 5.4 | 17.0 | 13.6 | 17.1    | 18.3    | 15.3    |

|      |      |      |      |      |      |      |
|------|------|------|------|------|------|------|
|      | 5.4  | 19.1 | 16.6 | 17.7 | 19.2 | 15.7 |
|      | 5.4  | 19.2 | 16.8 | 18.8 | 19.9 | 16.8 |
|      | 5.8  | 22.3 | 17.0 | 19.8 | 20.0 | 17.8 |
|      | 6.6  | 24.2 | 18.4 | 20.1 | 20.6 | 18.4 |
|      | 6.8  | 24.9 | 18.6 | 20.9 | 21.4 | 19.8 |
|      | 6.9  | 24.9 | 18.7 | 21.3 | 22.0 | 20.2 |
|      | 7.5  | 26.3 | 20.2 | 22.4 | 22.7 | 21.6 |
| 0.5h | 5.3  | 23.0 | 14.6 | 12.6 | 15.2 | 14.1 |
|      | 5.4  | 26.2 | 15.1 | 18.9 | 15.3 | 14.8 |
|      | 6.1  | 26.6 | 15.3 | 19.6 | 17.4 | 16.5 |
|      | 6.2  | 27.4 | 15.7 | 19.8 | 18.3 | 16.8 |
|      | 6.3  | 27.6 | 16.8 | 21.9 | 21.4 | 17.4 |
|      | 7.5  | 27.7 | 18.7 | 22.9 | 22.2 | 18.9 |
|      | 7.8  | 29.4 | 21.2 | 24.1 | 22.4 | 19.7 |
|      | 8.5  | 31.4 | 22.7 | 26.2 | 23.5 | 23.1 |
|      | 8.9  | 31.7 | 23.6 | 26.9 | 24.5 | 24.3 |
|      | 9.1  | 31.7 | 25.0 | 27.4 | 24.8 | 25.5 |
| 1h   | 6.8  | 23.9 | 18.7 | 19.2 | 17.7 | 17.8 |
|      | 7.0  | 26.8 | 19.8 | 20.9 | 18.7 | 19.6 |
|      | 7.5  | 27.3 | 20.6 | 22.9 | 19.6 | 19.8 |
|      | 7.8  | 31.0 | 20.7 | 23.4 | 20.1 | 19.9 |
|      | 7.9  | 31.9 | 21.6 | 23.6 | 22.1 | 20.4 |
|      | 8.2  | 32.1 | 22.3 | 24.0 | 22.2 | 20.7 |
|      | 8.4  | 32.7 | 22.7 | 24.2 | 23.4 | 21.6 |
|      | 8.4  | 34.0 | 23.4 | 26.7 | 23.9 | 21.9 |
|      | 8.6  | 34.9 | 25.9 | 27.4 | 25.7 | 24.4 |
|      | 8.8  | 35.0 | 29.2 | 29.5 | 28.2 | 24.8 |
| 2h   | 5.2  | 21.7 | 16.9 | 17.8 | 15.4 | 17.6 |
|      | 5.8  | 22.4 | 18.7 | 18.3 | 16.7 | 17.8 |
|      | 5.9  | 25.9 | 19.9 | 18.9 | 16.9 | 18.4 |
|      | 6.1  | 26.2 | 20.1 | 19.1 | 17.3 | 19.4 |
|      | 6.8  | 26.3 | 20.5 | 19.1 | 17.5 | 20.1 |
|      | 6.9  | 26.9 | 20.9 | 21.3 | 18.2 | 20.2 |
|      | 7.0  | 28.2 | 21.1 | 22.1 | 18.6 | 20.4 |
|      | 7.2  | 28.3 | 21.3 | 23.1 | 19.8 | 20.4 |
|      | 7.5  | 28.9 | 23.6 | 23.6 | 22.5 | 20.7 |
|      | 7.8  | 29.8 | 23.7 | 25.2 | 24.0 | 21.4 |
| AUC  | 12.2 | 45.6 | 35.0 | 34.2 | 30.7 | 34.2 |
|      | 12.1 | 48.6 | 34.7 | 38.4 | 34.2 | 34.3 |
|      | 13.0 | 51.0 | 36.4 | 40.7 | 36.4 | 36.1 |
|      | 13.3 | 54.8 | 37.6 | 41.4 | 37.7 | 37.0 |
|      | 13.9 | 55.7 | 39.0 | 42.9 | 41.0 | 38.3 |
|      | 14.8 | 57.0 | 40.8 | 45.0 | 41.9 | 39.5 |

|  |      |      |      |      |      |      |
|--|------|------|------|------|------|------|
|  | 15.3 | 59.4 | 42.8 | 46.3 | 43.2 | 40.9 |
|  | 15.8 | 61.6 | 44.2 | 49.9 | 44.9 | 43.1 |
|  | 16.4 | 62.7 | 47.7 | 51.1 | 48.3 | 45.8 |
|  | 16.9 | 63.6 | 51.3 | 54.0 | 51.2 | 47.5 |

**Fig. 5** Effects of Pdio on GHb in diabetic rats.

|     | NC   | DC   | MET  | Pdio-10 | Pdio-20 | Pdio-40 |
|-----|------|------|------|---------|---------|---------|
| GHb | 16.4 | 37.7 | 25.5 | 26.2    | 25.6    | 25.1    |
|     | 23.4 | 37.1 | 26.8 | 30.5    | 28.3    | 25.9    |
|     | 20.1 | 33.3 | 25.8 | 30.9    | 30.1    | 29.0    |
|     | 26.4 | 42.7 | 25.8 | 34.1    | 32.0    | 30.6    |
|     | 25.4 | 38.2 | 29.5 | 32.6    | 30.8    | 23.5    |

|  |      |      |      |      |      |      |
|--|------|------|------|------|------|------|
|  | 18.3 | 40.7 | 39.5 | 35.5 | 24.0 | 17.0 |
|  | 21.8 | 39.7 | 35.1 | 40.7 | 39.7 | 26.8 |
|  | 22.1 | 45.7 | 25.1 | 22.8 | 25.4 | 32.8 |
|  | 24.7 | 38.2 | 38.6 | 37.6 | 34.6 | 36.4 |
|  | 19.7 | 23.6 | 28.6 | 27.7 | 25.6 | 20.8 |

**Fig. 6** Grade of histopathological changes

|                                           | NC | DC | MET | Pdio-10 | Pdio-20 | Pdio-40 |
|-------------------------------------------|----|----|-----|---------|---------|---------|
| <b>Grade of histopathological changes</b> | 1  | 3  | 2   | 2       | 2       | 2       |
|                                           | 0  | 3  | 3   | 2       | 3       | 1       |
|                                           | 1  | 3  | 1   | 2       | 1       | 3       |
|                                           | 1  | 2  | 0   | 2       | 1       | 2       |
|                                           | 0  | 3  | 1   | 3       | 1       | 0       |
|                                           | 0  | 3  | 1   | 3       | 2       | 2       |

|  |   |   |   |   |   |   |
|--|---|---|---|---|---|---|
|  | 0 | 2 | 2 | 2 | 2 | 1 |
|  | 0 | 2 | 3 | 1 | 2 | 2 |
|  | 0 | 2 | 1 | 1 | 1 | 1 |
|  | 0 | 1 | 0 | 1 | 1 | 0 |

**Fig. 7** Effect of Pdio on adiponectin in diabetic rats.

|             | NC   | DC   | MET  | Pdio-10 | Pdio-20 | Pdio-40 |
|-------------|------|------|------|---------|---------|---------|
| adiponectin | 1.44 | 0.97 | 1.55 | 0.62    | 1.56    | 1.51    |
|             | 1.34 | 1.41 | 1.28 | 1.05    | 1.43    | 1.59    |
|             | 1.01 | 1.23 | 1.58 | 1.09    | 1.21    | 0.79    |
|             | 1.64 | 1.27 | 1.58 | 1.41    | 1.42    | 1.66    |
|             | 0.54 | 1.02 | 1.25 | 1.26    | 1.08    | 1.35    |
|             | 0.83 | 1.07 | 1.25 | 1.55    | 1.44    | 1.63    |
|             | 1.18 | 0.97 | 1.51 | 1.07    | 1.47    | 1.68    |

|  |      |      |      |      |      |      |
|--|------|------|------|------|------|------|
|  | 1.21 | 1.57 | 0.51 | 0.98 | 1.54 | 1.78 |
|  | 1.47 | 0.92 | 1.26 | 1.36 | 1.46 | 1.69 |
|  | 1.97 | 1.06 | 0.86 | 1.67 | 1.56 | 1.58 |

**Fig. 8** Effect of Pdio on GLUT-4 in diabetic rats.

|        | NC    | DC   | MET  | Pdio-10 | Pdio-20 | Pdio-40 |
|--------|-------|------|------|---------|---------|---------|
| GLUT-4 | 7.38  | 5.60 | 6.21 | 6.60    | 7.33    | 8.11    |
|        | 10.34 | 6.69 | 8.72 | 8.38    | 7.61    | 9.69    |
|        | 10.91 | 5.77 | 6.28 | 6.49    | 6.82    | 8.09    |
|        | 8.46  | 6.17 | 7.70 | 7.13    | 9.43    | 8.27    |
|        | 10.40 | 6.03 | 6.63 | 7.05    | 8.79    | 7.23    |
|        | 7.63  | 4.97 | 5.47 | 8.90    | 9.02    | 7.58    |
|        | 8.99  | 8.86 | 8.04 | 8.43    | 8.11    | 9.43    |
|        | 12.60 | 9.26 | 7.65 | 8.61    | 6.95    | 9.54    |

|  |      |      |      |      |      |      |
|--|------|------|------|------|------|------|
|  | 9.29 | 7.73 | 6.75 | 6.63 | 9.02 | 7.23 |
|  | 7.21 | 6.97 | 7.22 | 8.26 | 8.19 | 9.92 |
